# Supplementary material
Source: PubMed Central journal article supplement (PMC5286929)
Supplement: 2016_142471-Disclosures_and_Contributions.pdf [file 2016_142471-Disclosures_and_Contributions.pdf]

Haematologica  
HAEMATOL/2016/142471  
Version 4

Propagation of thrombosis by neutrophils and extracellular nucleosome  
networks

Susanne Pfeiler, Konstantin Stark, Steffen Massberg, and Bernd  
Engelmann

Disclosures: none

Contributions: Work performed in the labs of Bernd Engelmann and Steffen Massberg mentioned in this review has been supported by grants of the DFG, including SFB 1123, and from Deutsche Krebshilfe.
